# Supplementary material
Source: publisher figshare collection journal article supplement (https://acs.figshare.com/ndownloader/files/3916135)
Supplement: Supplementary file 1 [file 3916135]

## Supporting Information

### **Graphene Transistors with Multi-functional Polymer Brushes for Biosensing Applications**

*Lucas H. Hess, Alina Lyuleeva, Benno M. Blaschke, Matthias Sachsenhauser, Max Seifert, Frank Deubel, and Jose A. Garrido\**

L.H. Hess, A. Lyuleeva, B.M. Blaschke, M. Sachsenhauser, M. Seifert, Dr. J.A. Garrido  
Walter Schottky Institut and Physik-Department  
Technische Universität München  
Am Coulombwall 4, 85748 Garching, Germany  
E-mail: garrido@wsi.tum.de  
Dr. F. Deubel  
WACKER-Lehrstuhl für Makromolekulare Chemie  
Technische Universität München  
Lichtenbergstrasse 4, 85748 Garching, Germany  
Current address:  
Consortium für elektrochemische Industrie, Wacker Chemie AG  
Zielstattstraße 20, 81379 München, Germany

## Stability

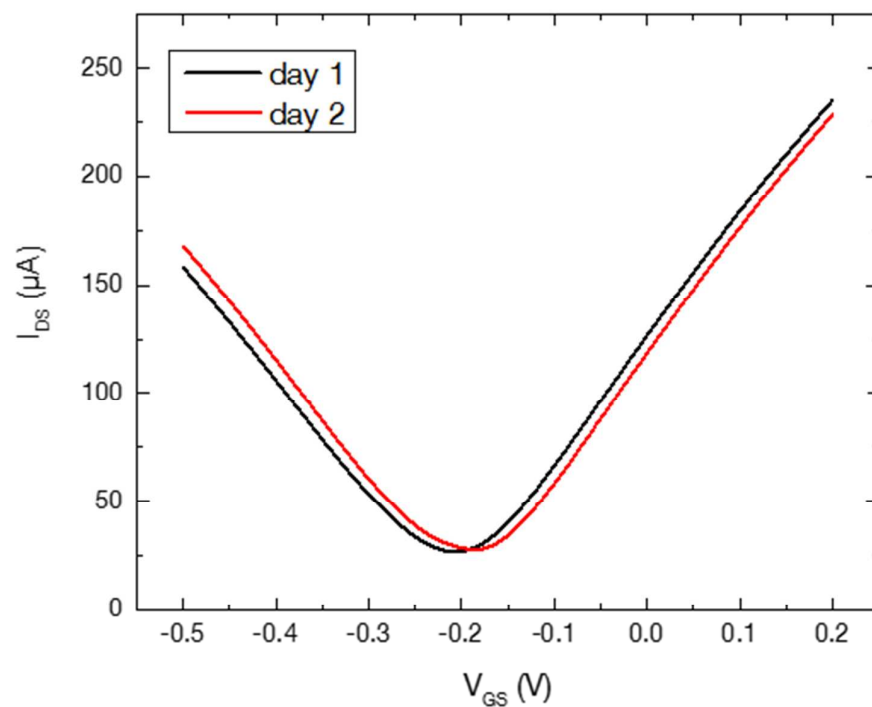

Figure S1: I-V characteristics of a polymer-modified transistor on two different days. The observed curves are practically identical. The observed slope, i.e. the transconductance, does not change over two days of experiments. The small shift can be explained by a slightly different pH of the used electrolyte.

pH measurements

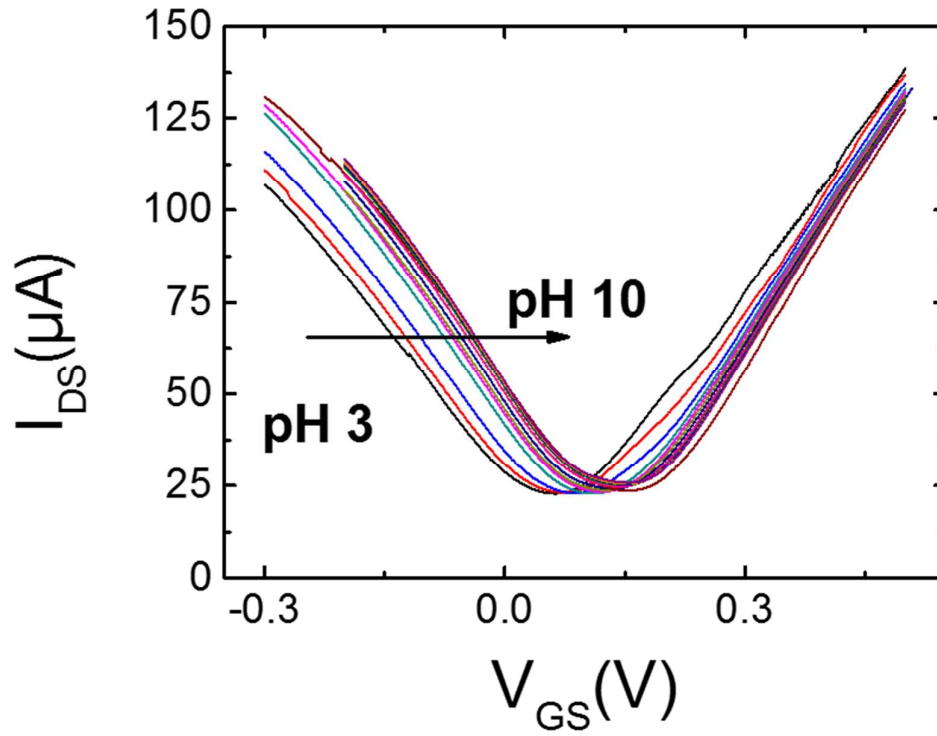

Figure S2: I-V characteristics of a graphene SGFET at different pH

pH model

The local proton concentration at the surface is given by:

$$[H^+] = [H^+]_{bulk} \exp(-e\phi / k_B T)$$

The acid dissociation constant of the surface group is defined as:

$$\begin{aligned} K_a &= \frac{[H^+][A^-]}{[HA]} = \frac{[H^+][A]_0 - [HA]}{[HA]} \\ \Leftrightarrow K_a [HA] &= [H^+][A]_0 - [HA] \\ \Leftrightarrow 10^{-pK_a} [HA] &= 10^{-pH} \exp(-e\phi / k_B T) ([A]_0 - [HA]) \\ \Leftrightarrow [HA] &= [A]_0 (1 + 10^{pH-pK_a} \exp(e\phi / k_B T))^{-1} \end{aligned}$$

$[HA]$ ,  $[A^-]$ ,  $[A]_0$  are the concentrations of protonated, deprotonated, and total groups. As the charge changes by  $+e$  for the protonated groups, the additional surface charge is given by

$$\sigma_{surf} = [HA]$$

### Different substrates and copper etchants

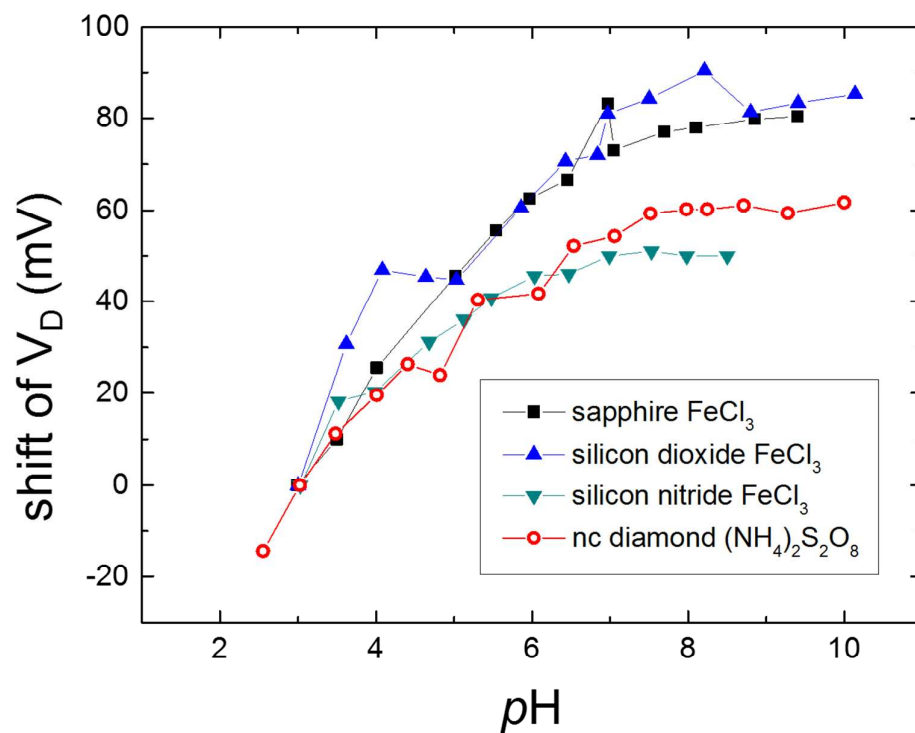

Figure S3: The shift of  $U_{Dirac}$  with pH for a bare graphene transistors on different substrates and different copper etchants. All samples exhibited a higher sensitivity at lower pH (<7), and a low sensitivity at higher pH.

### Transistor characteristics after functionalization

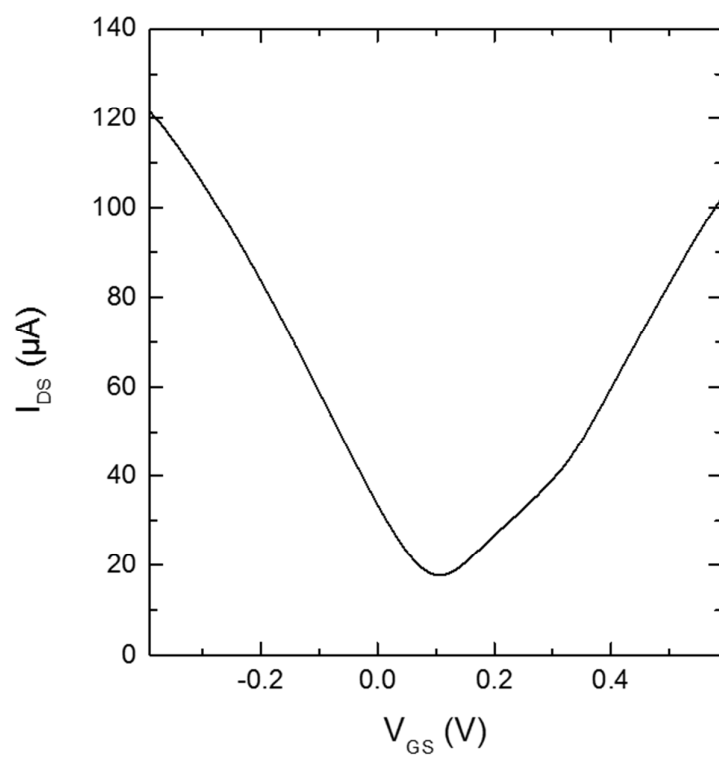

Figure S4: I-V characteristics after the functionalization with AChE. Similar current values and slopes are observed as for pristine transistors (Fig2c)
